# Supplementary material for: Effects of Adsorption and Desorption of Low-Boiling-Point Total Hydrocarbon Gases on Activated Carbon
Source: MDPI journal article supplement (doi:10.3390/ma17020384), 2024-01-12
Supplement: s1 [file s1]

Supplementary materials

# Effects of Adsorption and Desorption of Low-Boiling-Point THC Gases on Activated Carbon

Hye-Jin Lee, Jung-Eun Park and Bum-Ui Hong \*

Center for Bio Resource, Institute for Advanced Engineering; Yongin-si 17180, Republic of Korea; hjlee@iae.re.kr (H.-J.L.); jepark0123@gmail.com (J.-E.P.)

\* Correspondence: buhong@iae.re.kr

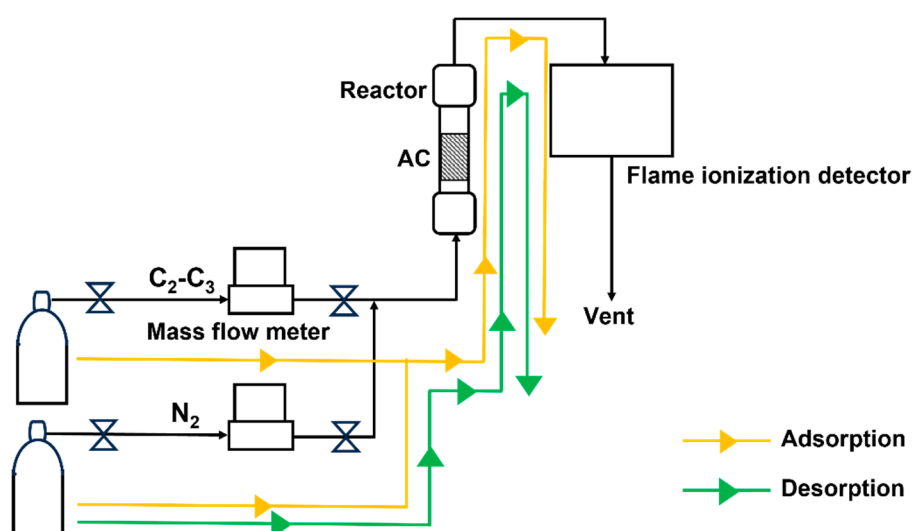

Figure S1. Schematic of the adsorption and desorption experiments.
